# Supplementary material for: Genome-Wide Association Study in BRCA1 Mutation Carriers Identifies Novel Loci Associated with Breast and Ovarian Cancer Risk
Source: PubMed Central journal article supplement (PMC3609646; doi:10.1371/journal.pgen.1003212), 2013-03-27

A. Breast Cancer

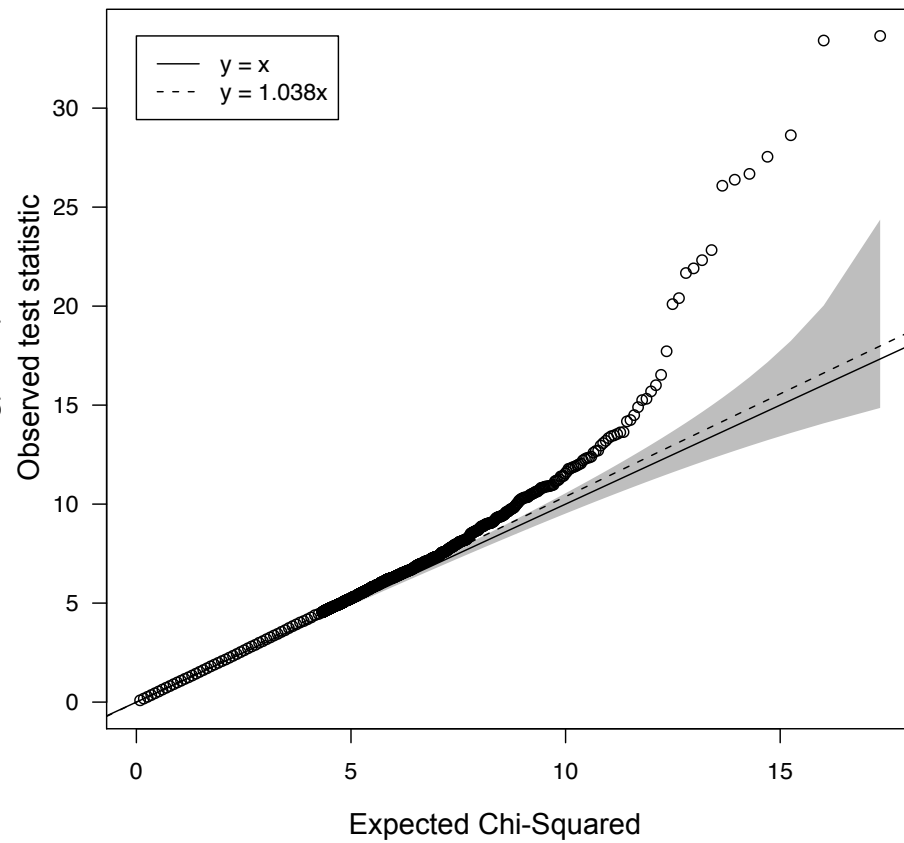

B. Ovarian Cancer

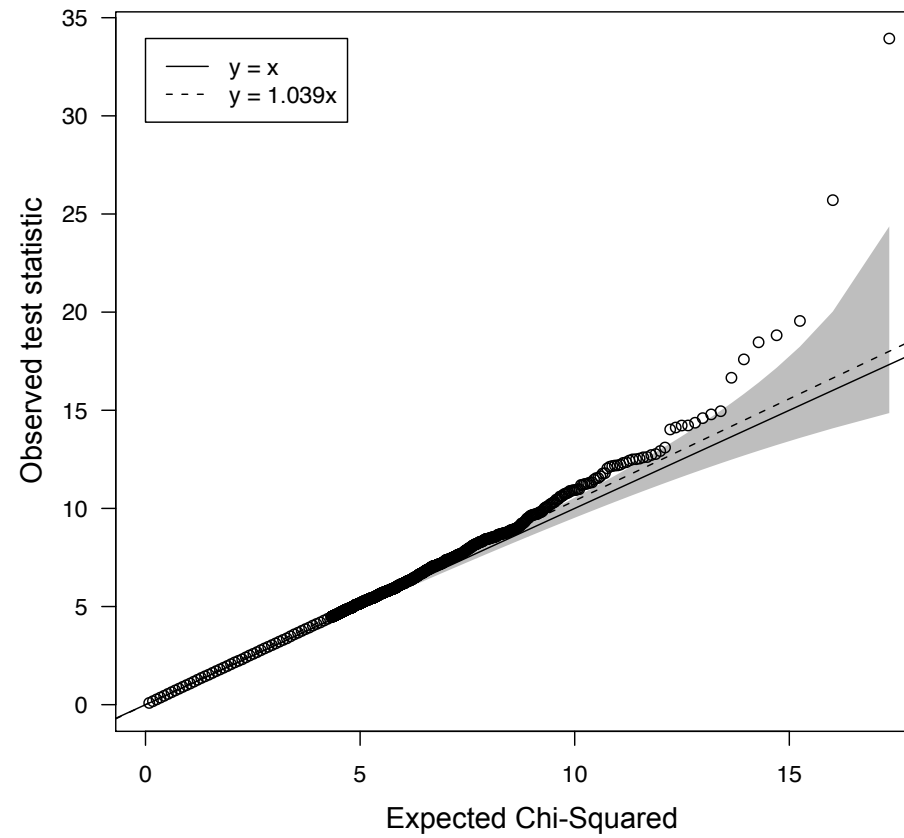

Supplement: pgen.1003212.s003.pdf [file pgen.1003212.s003.pdf]
