# Supplementary material for: Genome-Wide Association Study in BRCA1 Mutation Carriers Identifies Novel Loci Associated with Breast and Ovarian Cancer Risk
Source: PubMed Central journal article supplement (PMC3609646; doi:10.1371/journal.pgen.1003212), 2013-03-27
Supplement: pgen.1003212.s008.pdf [file pgen.1003212.s008.pdf]

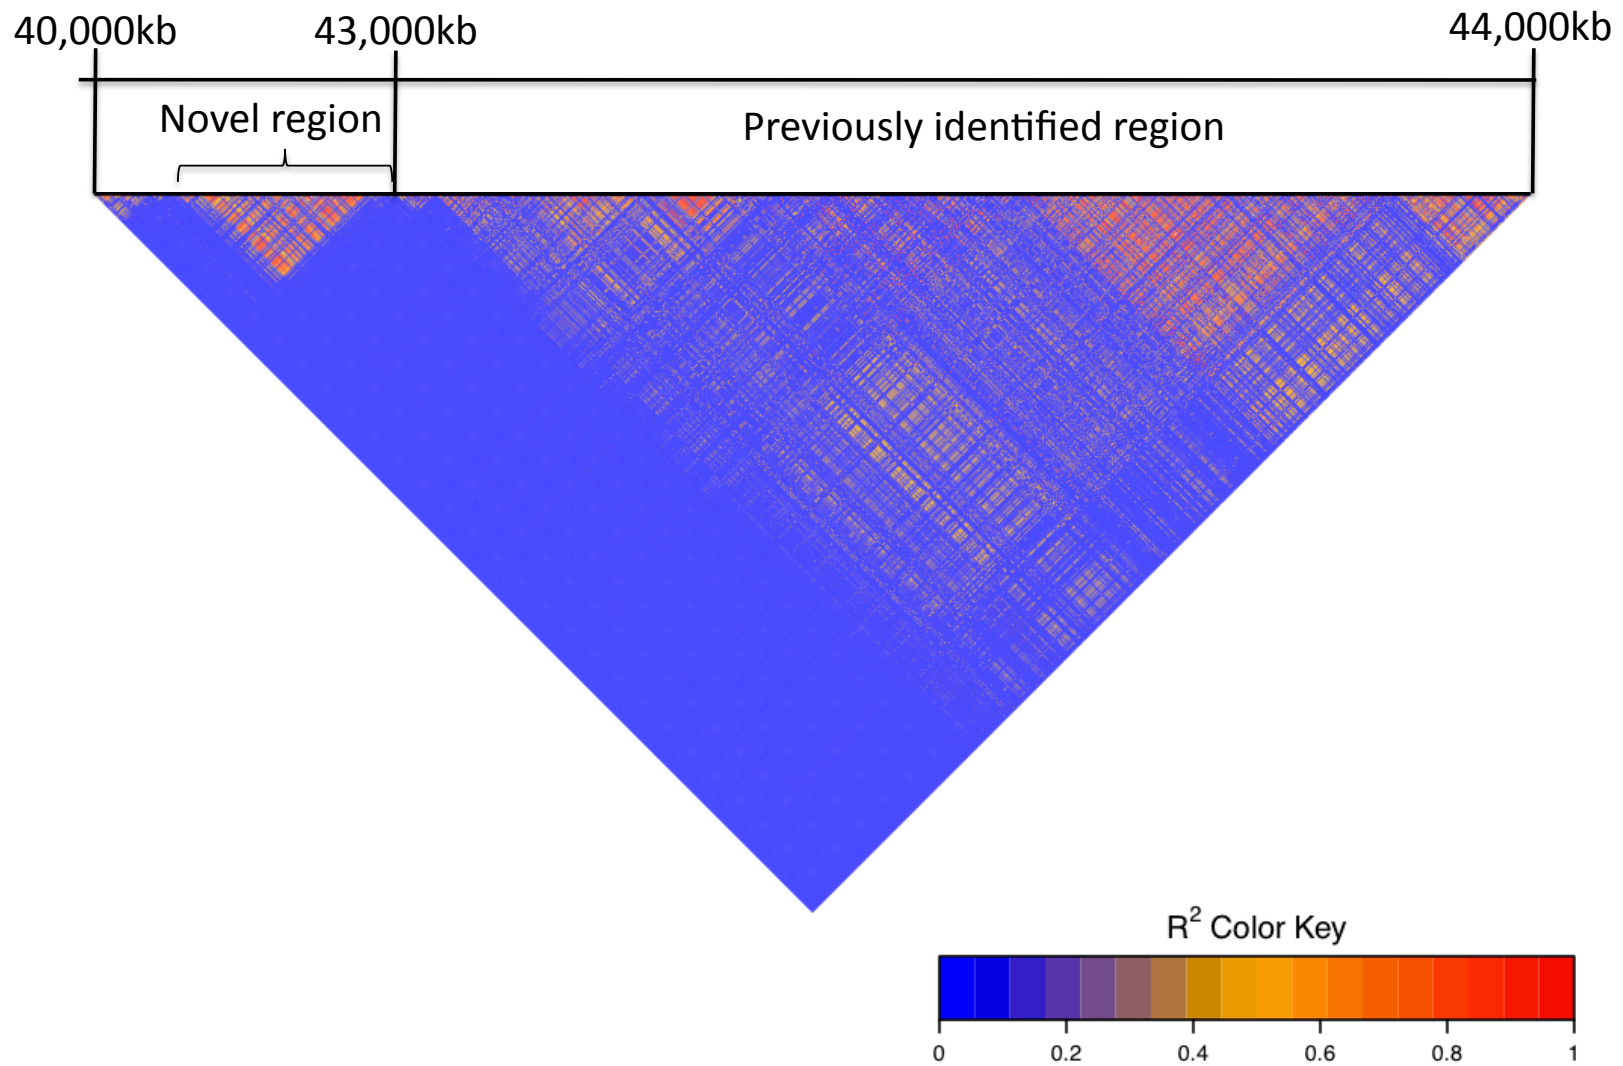

Supplementary Figure 8
